# Supplementary material for: A functionally distinct neutrophil landscape in severe COVID-19 reveals opportunities for adjunctive therapies
Source: PubMed Central journal article supplement (PMC8855826; doi:10.1172/jci.insight.152291), 2022-01-25
Supplement: jciinsight-7-152291-s047.pdf [file jciinsight-7-152291-s047.pdf]

## Supplementary Data for

### **A functionally distinct neutrophil landscape in severe COVID-19 reveals opportunities for adjunctive therapies**

Rachita Panda<sup>\*1,2</sup>, Fernanda VS Castanheira<sup>\*1,2</sup>, Jared Schlechte<sup>\*1,3</sup>, Bas GJ Surewaard<sup>1,4</sup>, Hanjoo Brian Shim<sup>1,2</sup>, Amanda Z Zucoloto<sup>1,3</sup>, Zdenka Slavikova<sup>3</sup>, Bryan G Yipp<sup>1,3</sup>, Paul Kubes<sup>1,2,3</sup>, Braedon McDonald<sup>1,3</sup>

<sup>1</sup>Snyder Institute for Chronic Diseases, Cummings School of Medicine, University of Calgary, Calgary, AB, Canada

<sup>2</sup>Department of Physiology and Pharmacology, Cummings School of Medicine, University of Calgary, Calgary, AB, Canada

<sup>3</sup>Department of Critical Care Medicine, Cummings School of Medicine, University of Calgary, Calgary, AB, Canada

<sup>4</sup>Department of Microbiology, Immunology, and Infectious Diseases, Cummings School of Medicine, University of Calgary, Calgary, AB, Canada

\*These authors contributed equally to this work.

## Supplementary Figure 1

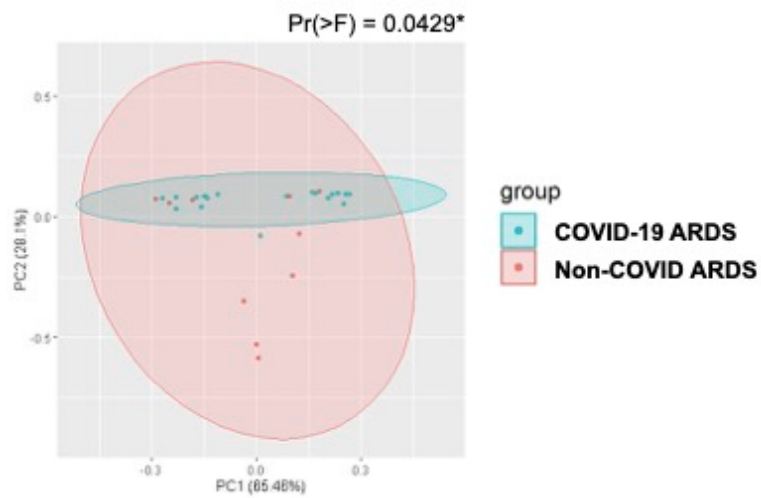

**Supplementary Figure 1.** Principal component analysis of neutrophil cluster abundance (from Figure 2C) at ICU admission in patients with COVID -19 ARDS (N=19) and Non-COVID ARDS (N=10). \* $p < 0.05$  by PERMANOVA test.

## Supplementary Figure 2

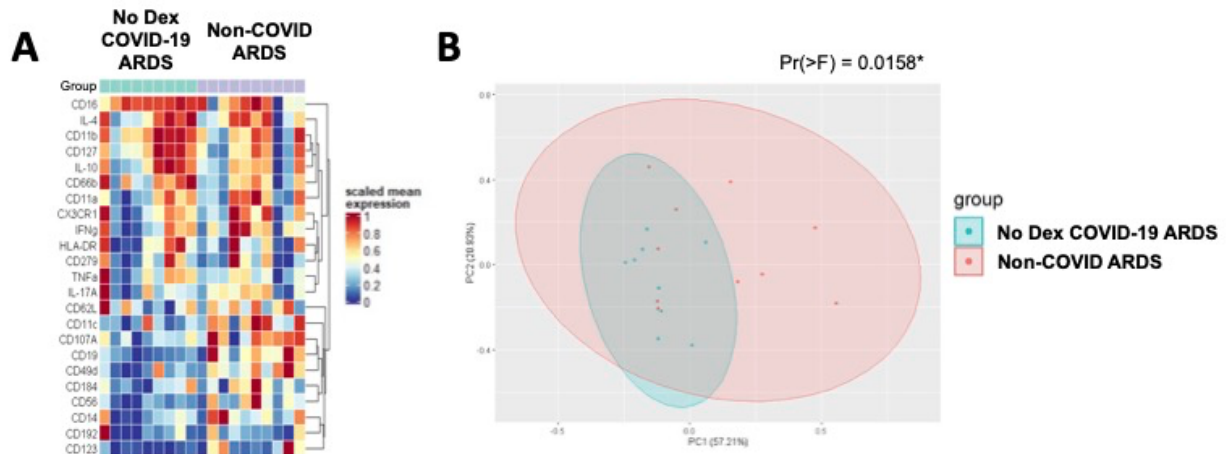

**Supplementary Figure 2.** Subgroup analysis of comparing (A) expression levels of neutrophil surface and intracellular markers, and (B) principal component analysis of neutrophil marker expression at ICU admission in patients with non-COVID ARDS (N=10) versus patients with COVID-19 ARDS who did not receive dexamethasone treatment (N=9). \* $p < 0.05$  by PERMANOVA test.

### Supplementary Figure 3

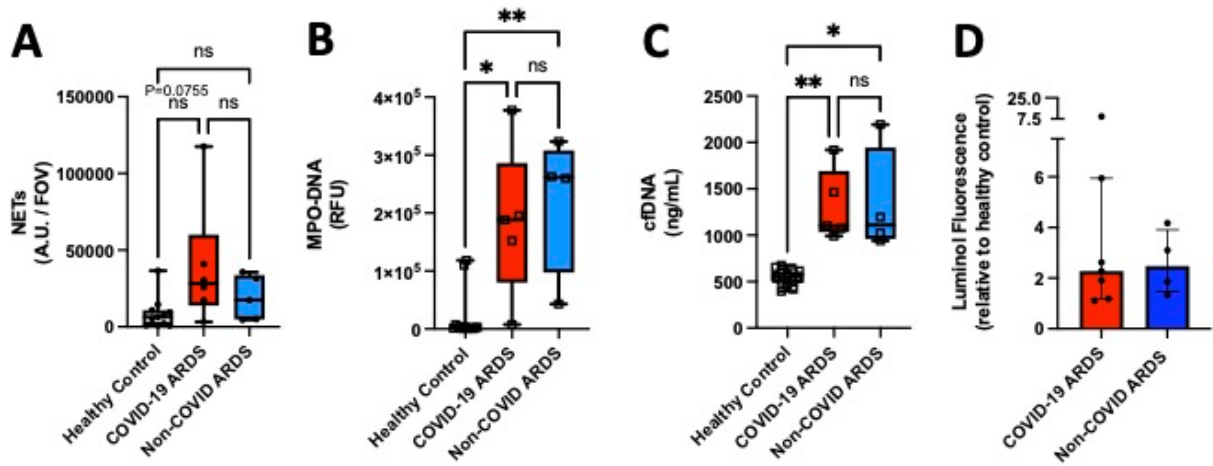

**Supplementary Figure 3. NETs and ROS production by neutrophils on day 7 of ICU admission.** (A) Quantitation of area per field of view covered by NETs released from neutrophils ex vivo, as well as plasma concentrations of (B) MPO-DNA complexes, and (C) cell-free (cf) DNA in patients with COVID-19 (N=5-6) and non-COVID ARDS (N=4-5) at ICU day 7 as well as healthy controls (N=11-13). Data are individual patients, with median and range, \* $p < 0.05$  \*\* $p < 0.01$  by Kruskal-Wallis test with post-hoc Dunn's test. (D) Reactive oxygen species (ROS) production by neutrophils detected by luminol fluorescence assay shown as AUC in patients with COVID-19 ARDS (N=7) and non-COVID ARDS (N=4) relative to healthy control neutrophils. Data are individual patients, with median and interquartile range.

## Supplementary Figure 4

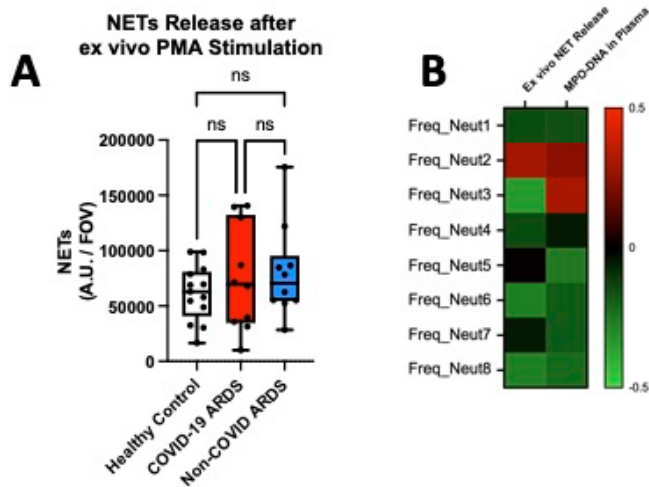

**Supplementary Figure 4.** (A) Quantification of NETs production (area per field of view covered by NETs) following stimulation with PMA by neutrophils from healthy controls (n= 13), COVID-19 ARDS (n= 10) and non-COVID ARDS (n=10). Data are individual patients, with median and range, ns = non-significant by Kruskal-Wallis test with post-hoc Dunn's test. (B) Heatmap depicting the Spearman correlation coefficient between the frequency (relative abundance) of individual neutrophil clusters versus the quantity of NETs measured by ex vivo NETs release or plasma MPO-DNA complexes.

## Supplementary Figure 5

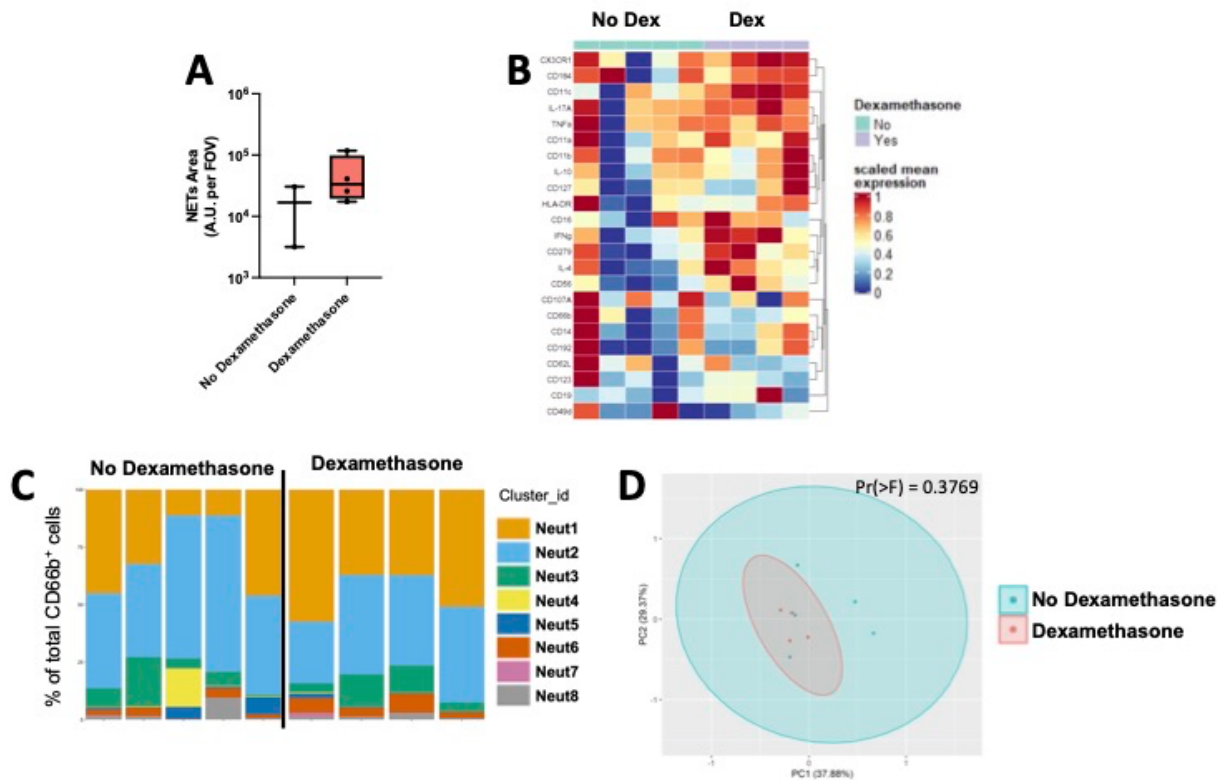

**Supplementary Figure 5. Pathological neutrophil priming in COVID-19 escapes treatment with dexamethasone on ICU day 7.** (A) Quantification of NETs production (NETs area per field of view) by neutrophils from patients with COVID-19 ARDS who received dexamethasone treatment (N=4) versus those who did not (N=2). Data are individual patients on ICU day 7 of ICU admission, with median and range. (B-D) Mass cytometry analysis of neutrophils from patients with COVID-19 ARDS on ICU day 7 who received dexamethasone treatment (N=4) versus those who did not (N=5), demonstrating (B) expression levels of selected neutrophil surface and intracellular markers, (C) relative abundance of neutrophils clusters in individual patient samples determined by FlowSOM analysis, and (D) principal component analysis of neutrophils,  $p=0.3769$  by PERMANOVA test.

## Supplementary Table 1

**Supplementary Table 1 - Patient characteristics for COVID-19 patients managed with or without dexamethasone therapy**

| Characteristics                                                                               | Dexamethasone (n=13) | No Dexamethasone (n=9) |
|-----------------------------------------------------------------------------------------------|----------------------|------------------------|
| <b>Demographics</b>                                                                           |                      |                        |
| Age - median (range)                                                                          | 62 (36 - 84)         | 56 (45 - 73)           |
| Male sex - n (%)                                                                              | 7 (53.8%)            | 6 (66.7%)              |
| Female sex - n (%)                                                                            | 6 (46.2%)            | 3 (33.3%)              |
| <b>Ethnicity</b>                                                                              |                      |                        |
| White                                                                                         | 3 (23.1%)            | 4 (44.4%)              |
| Asian                                                                                         | 3 (23.1%)            | 3 (33.3%)              |
| Black                                                                                         | 3 (23.1%)            | 0                      |
| Indigenous                                                                                    | 4 (30.8%)            | 2 (22.2%)              |
| <b>Cause of ARDS</b>                                                                          |                      |                        |
| SARS-CoV-2                                                                                    | 100%                 | 100%                   |
| <b>Clinical Characteristics</b>                                                               |                      |                        |
| Admission SOFA Score - median (range)                                                         | 7 (2 - 13)           | 10 (1 - 11)            |
| Admission P <sub>a</sub> O <sub>2</sub> /F <sub>i</sub> O <sub>2</sub> ratio - median (range) | 172 (72 - 270)       | 145 (102-285)          |
| Day 3 P <sub>a</sub> O <sub>2</sub> /F <sub>i</sub> O <sub>2</sub> ratio - median (range)     | 203 (66 - 314)       | 168 (83 - 400)         |
| <b>Therapies</b>                                                                              |                      |                        |
| Invasive mechanical ventilation - n (%)                                                       | 11 (84.6%)           | 7 (77.8%)              |
| Dexamethasone - n (%)                                                                         | 13 (100%)            | 0 (0%)                 |
| Tocilizumab - n (%)                                                                           | 0 (0%)               | 0 (0%)                 |
| Remdesivir - n (%)                                                                            | 2 (15.4%)            | 0 (0%)                 |
| Hydroxychloroquine - n (%)                                                                    | 0 (0%)               | 2 (22.2%)              |
| Antibiotics on admission - n (%)                                                              | 13 (100%)            | 9 (100%)               |
| <b>Outcomes</b>                                                                               |                      |                        |
| Duration of mechanical ventilation - median days (range)                                      | 10 (0 - 44)          | 11.5 (0 - 52)          |
| Duration of hospitalization - median days (range)                                             | 21 (6 - 62)          | 50 (8 - 193)           |
| 90 day mortality - n (%)                                                                      | 3 (23.1%)            | 1 (11.1%)              |

## Supplementary Table 2

**Supplementary Table 2 - Mass cytometry antibody panel**

| Marker       | Clone    | Metal           | Source     |
|--------------|----------|-----------------|------------|
| CD45         | HI30     | 89Y             | Fluidigm   |
| CD3          | UCHT1    | 141Pr           | Fluidigm   |
| CD19         | HIB19    | 142Nd           | Fluidigm   |
| CD107A       | H4A3     | 143Nd           | Biolegend* |
| CD4          | RPA-T4   | 145Nd           | Fluidigm   |
| CD8a         | RPA-T8   | 146Nd           | Fluidigm   |
| CD11c        | Bu15     | 147Sm           | Fluidigm   |
| IL-17A       | BL168    | 148Nd           | Fluidigm   |
| CD56         | NCAM16.2 | 149Sm           | Fluidigm   |
| CD192        | M-T701   | 150Nd           | Biolegend* |
| CD123        | 6H6      | 151Eu           | Fluidigm   |
| TNF $\alpha$ | Mab11    | 152Sm           | Fluidigm   |
| CD62L        | DREG-56  | 153Eu           | Fluidigm   |
| CD49d        | 9F10     | 154Sm           | Biolegend* |
| CD45RA       | HI100    | 155Gd           | Fluidigm   |
| CD184        | 12G5     | 156Gd           | Fluidigm   |
| IFN $\gamma$ | B27      | 158Gd           | Fluidigm   |
| FoxP3        | 259D/C7  | 159Tb           | Fluidigm   |
| CD14         | M5E2     | 160Gd           | Fluidigm   |
| CD66b        | 80H3     | 162Dy           | Fluidigm   |
| IL-4         | MP4-25D2 | 163Dy           | Fluidigm   |
| Granulysin   | RB1      | 165Ho           | Biolegend* |
| IL-10        | JES3-9D7 | 166Er           | Fluidigm   |
| CD11b        | ICRF44   | 167Er           | Fluidigm   |
| CD127        | A019D5   | 168Er           | Fluidigm   |
| CD25         | 2A3      | 169Tm           | Fluidigm   |
| CD11a        | HI111    | 170Er           | Biolegend* |
| Granzyme B   | GB11     | 171Yb           | Fluidigm   |
| CX3CR1       | 2A9-1    | 172Yb           | Fluidigm   |
| HLA-DR       | L243     | 173Yb           | Fluidigm   |
| CD279        | EH12.2H7 | 174Yb           | Fluidigm   |
| Perforin     | BD48     | 175Lu           | Fluidigm   |
| CD7          | K036C2   | 176Yb           | Biolegend* |
| CD16         | 3G8      | 209Bi           | Fluidigm   |
| Cell-ID Ir   | n/a      | Ir191 and Ir193 | Fluidigm   |

\*metal conjugation performed in house
